# Supplementary material for: Design and synthesis of hybrid cyclophanes containing thiophene and indole units via Grignard reaction, Fischer indolization and ring-closing metathesis as key steps
Source: publisher site journal article supplement (doi:10.3762/bjoc.11.165), 2015-08-31

**Supporting Information**  
**for**  
**Design and synthesis of hybrid cyclophanes containing**  
**thiophene and indole units via Grignard reaction, Fischer**  
**indolization and ring-closing metathesis as key steps**

Sambasivarao Kotha,<sup>\*</sup> Ajay Kumar Chinnam<sup>§</sup> and Mukesh E. Shirbhate<sup>§</sup>

Address: Department of Chemistry, Indian Institute of Technology-Bombay, Powai, India,

Fax: 022-2572 7152

Email: Sambasivarao Kotha - srk@chem.iitb.ac.in

\*Corresponding author

<sup>§</sup>A.K.C. and M.E.S. made an equal contribution to the paper.

**Copies of <sup>1</sup>H, <sup>13</sup>C NMR and HRMS spectra for all new compounds**

**$^1\text{H}$  NMR (400 MHz,  $\text{CDCl}_3$ ) and  $^{13}\text{C}$  NMR (100 MHz) of compound 6**

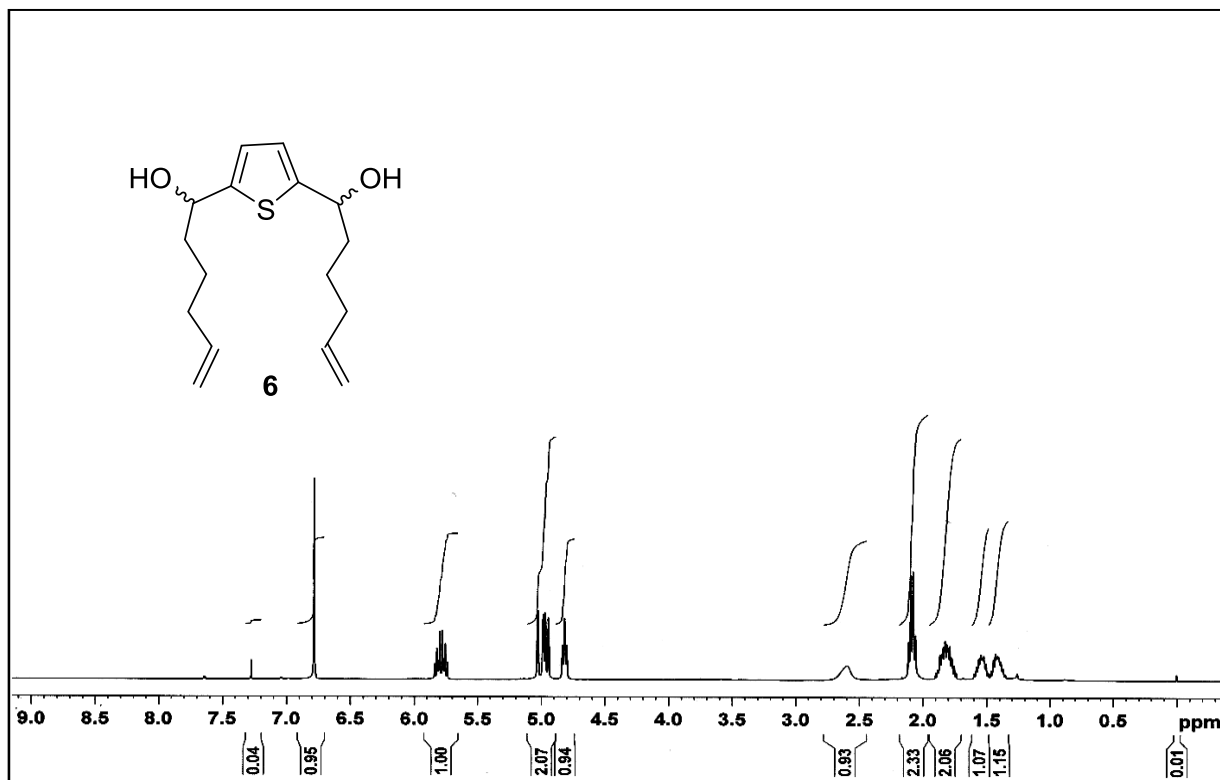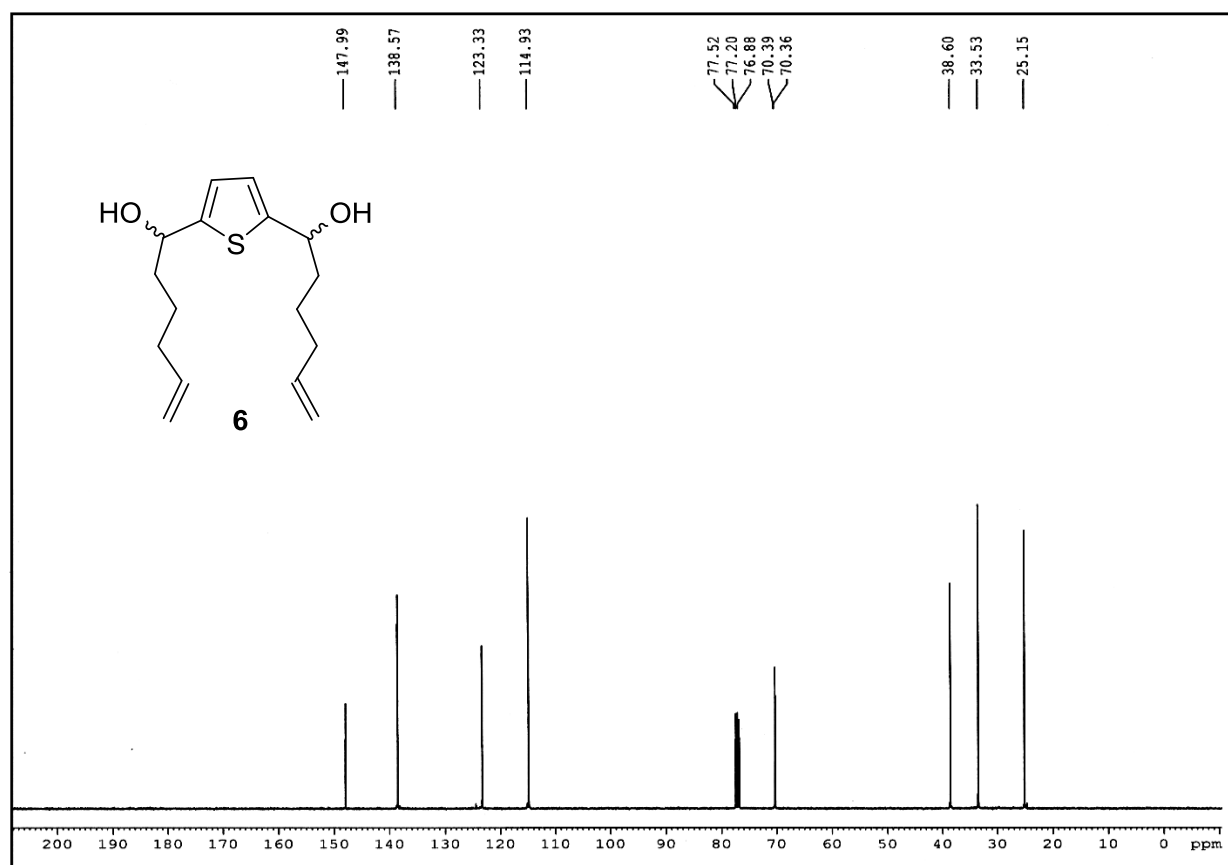

$^1\text{H}$  NMR (400 MHz,  $\text{CDCl}_3$ ) and  $^{13}\text{C}$  NMR (100 MHz) of compound 6a

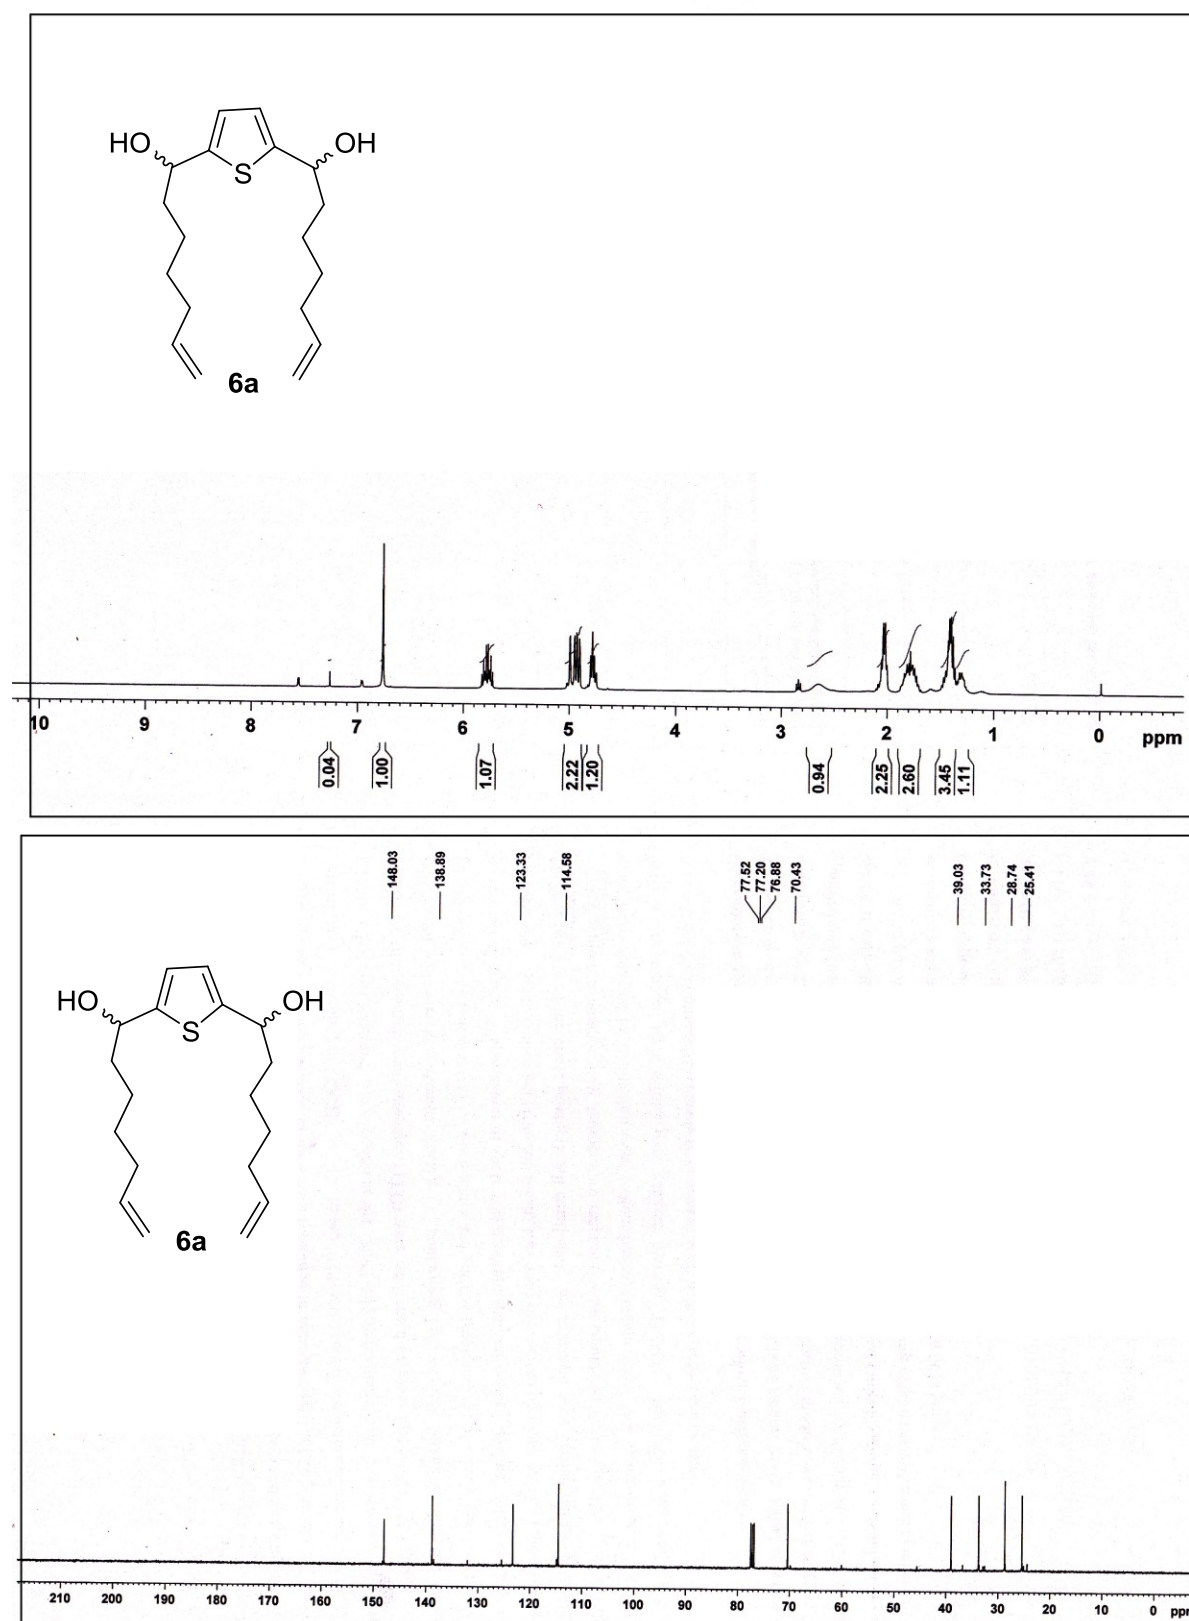

**$^1\text{H}$  NMR (400 MHz,  $\text{CDCl}_3$ ) and  $^{13}\text{C}$  NMR (100 MHz) of compound 3**

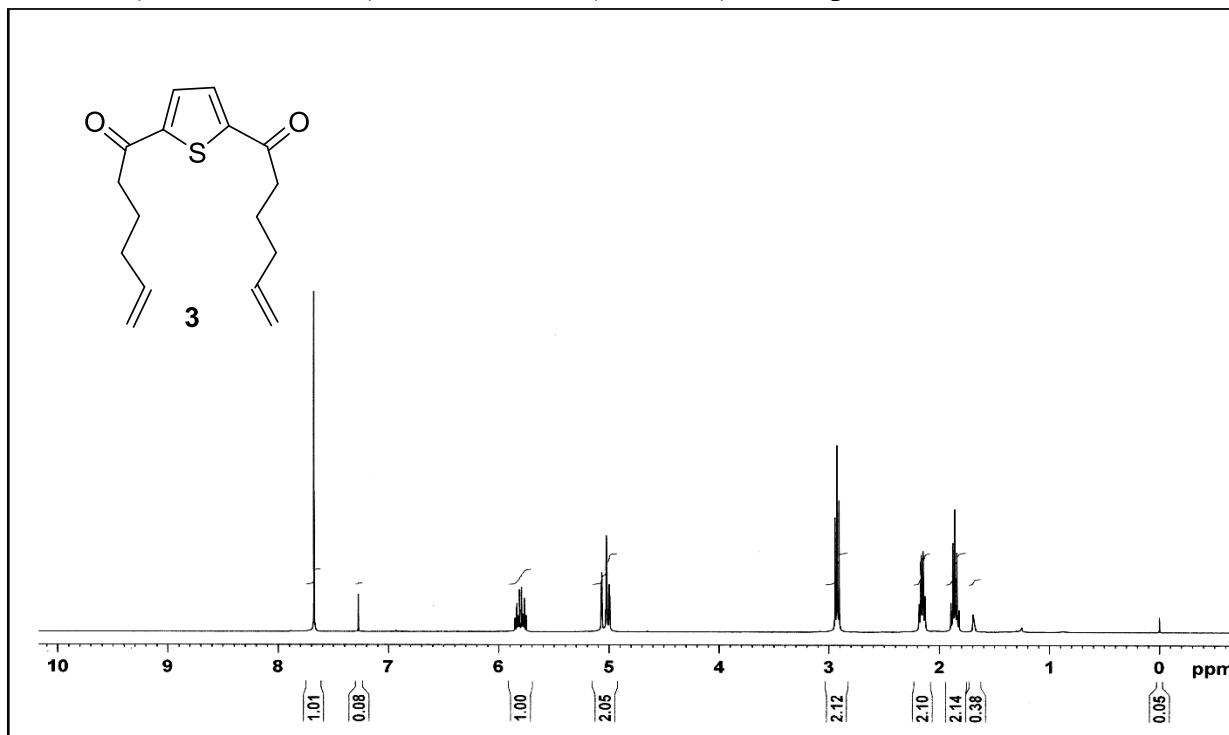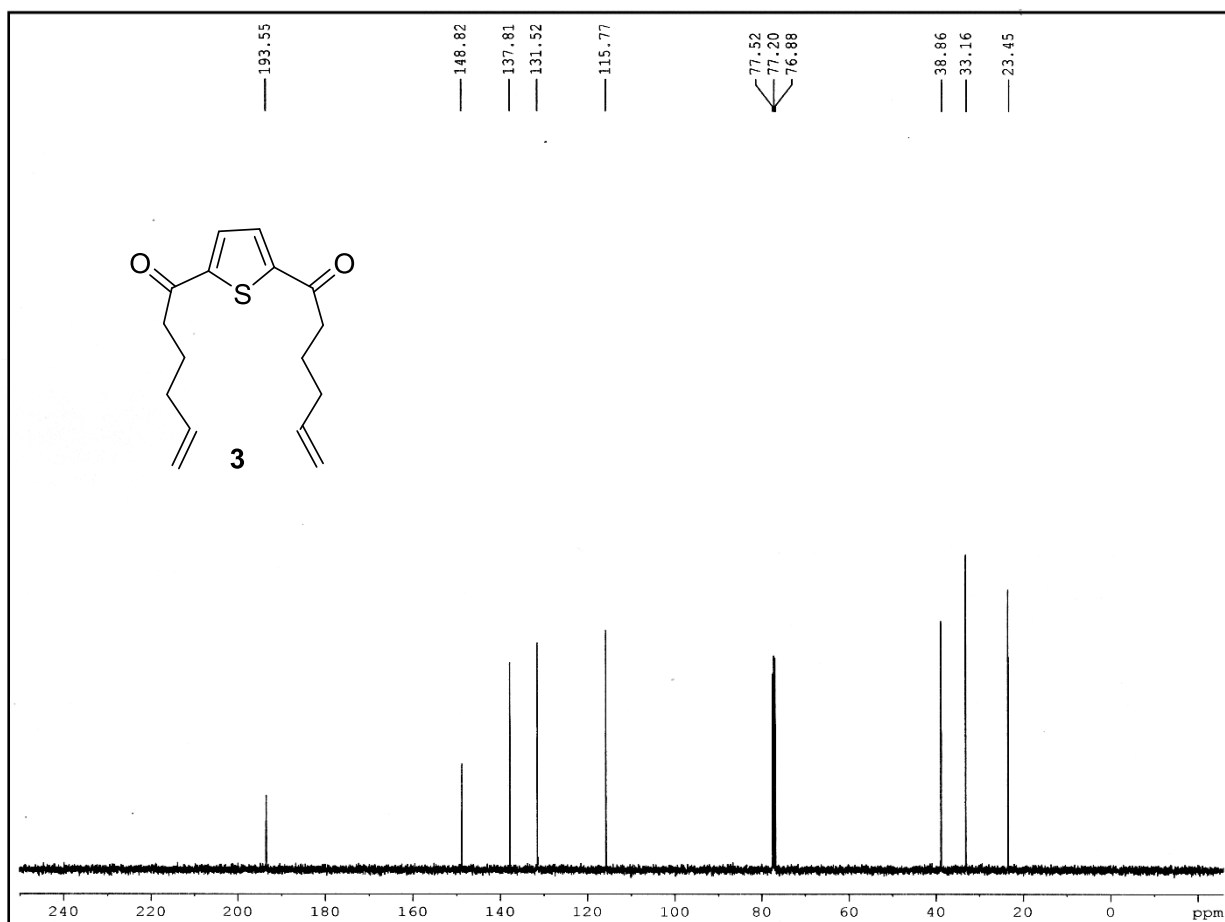

**$^1\text{H}$  NMR (400 MHz,  $\text{CDCl}_3$ ) and  $^{13}\text{C}$  NMR (100 MHz) of compound 3a**

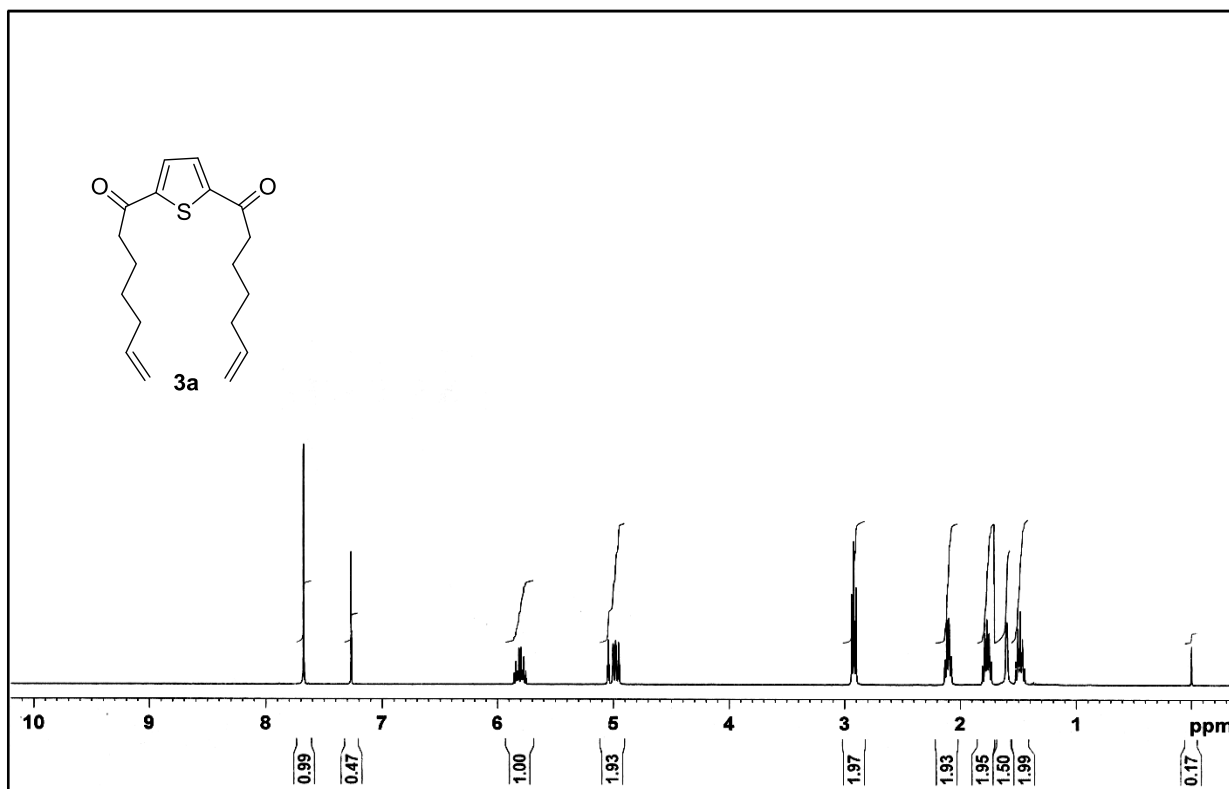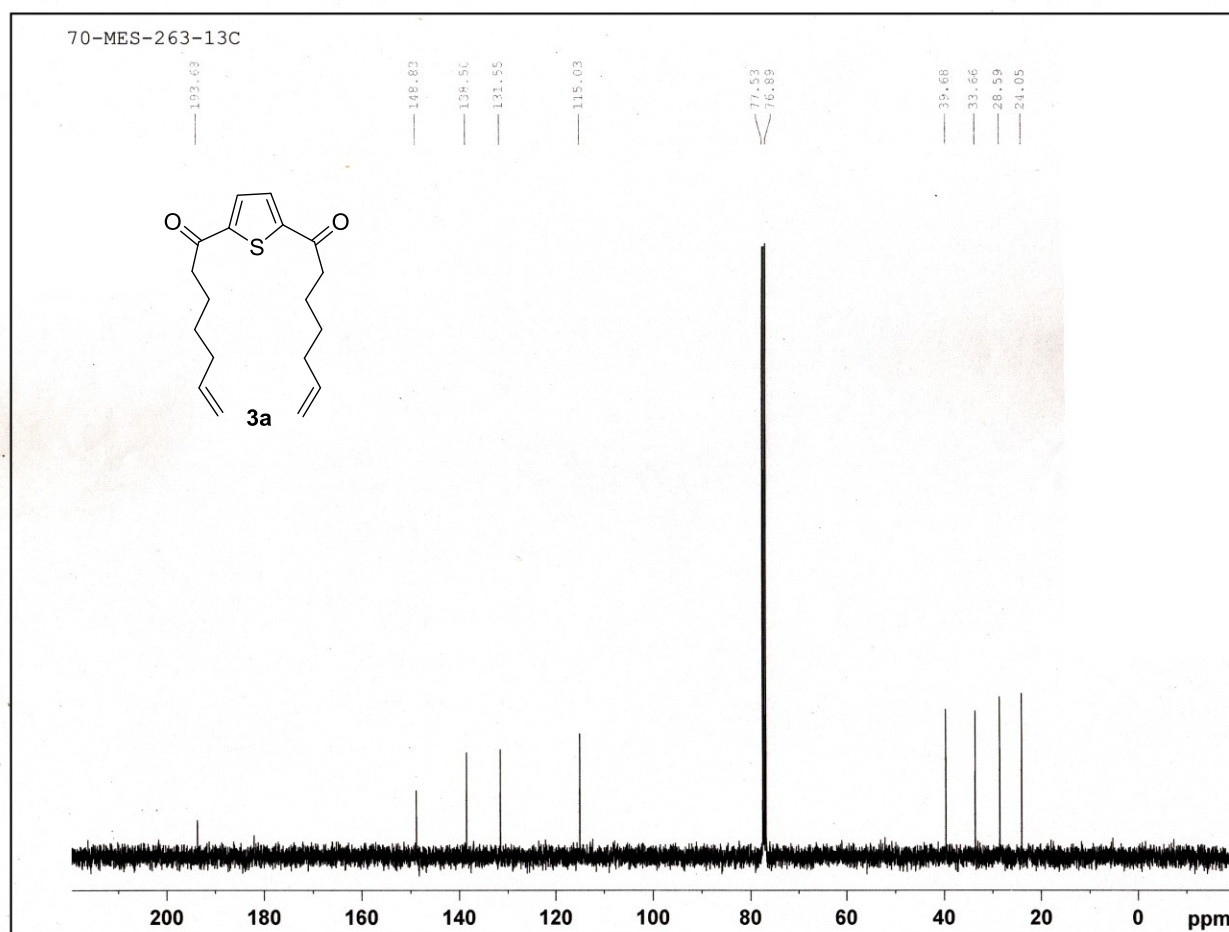

**$^1\text{H}$  NMR (500 MHz,  $\text{CDCl}_3$ ) and  $^{13}\text{C}$  NMR (100.6 MHz) of compound 5**

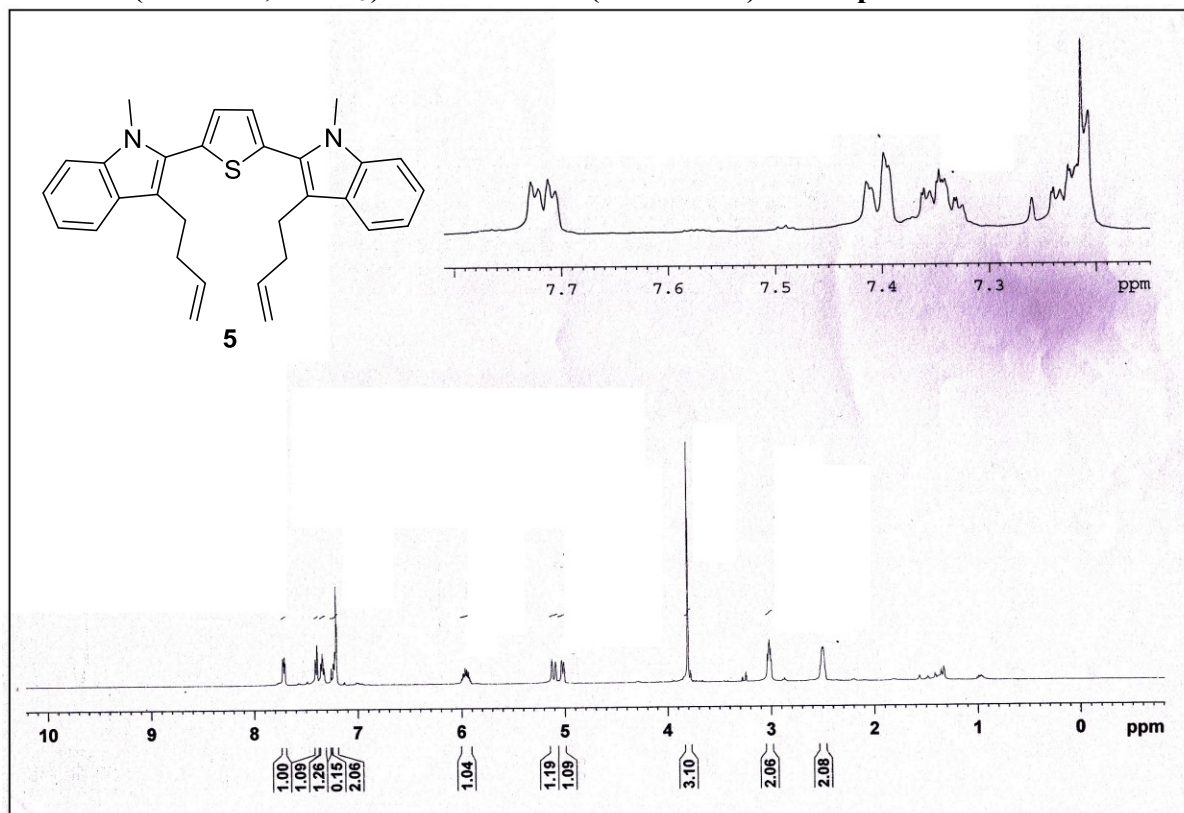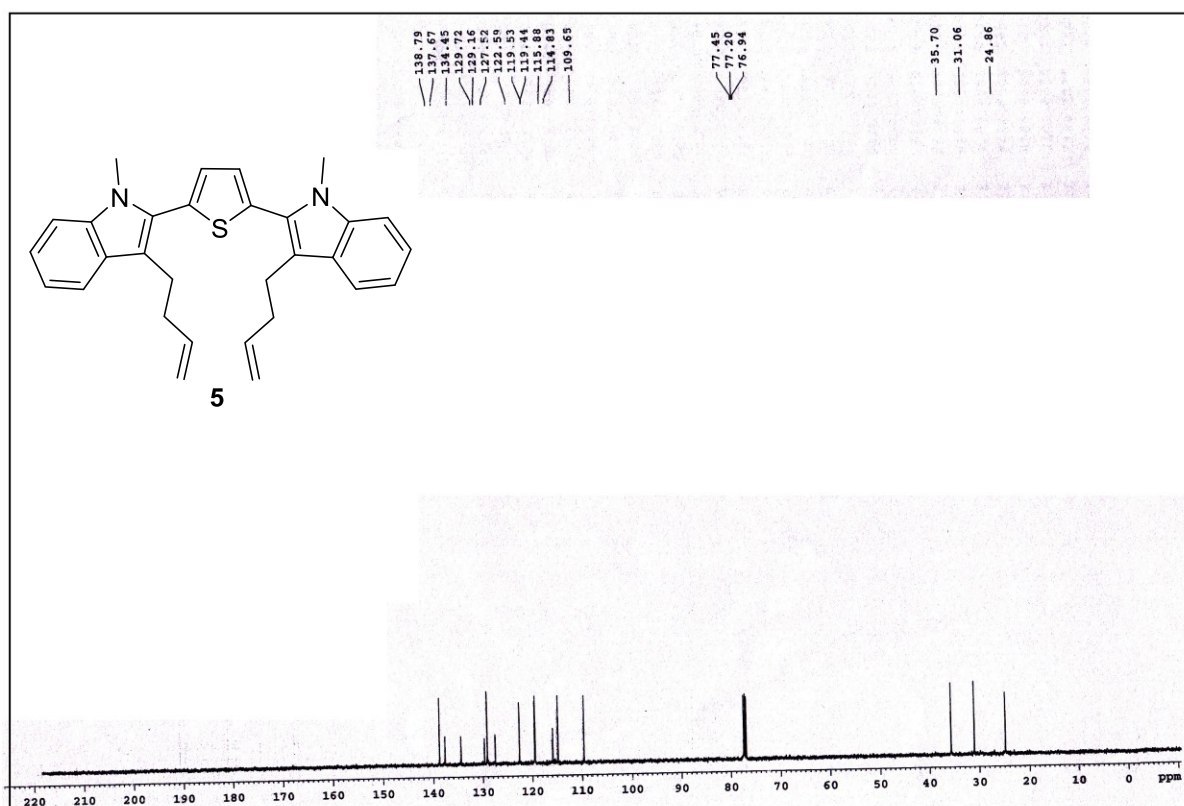

$^1\text{H}$  NMR (400 MHz,  $\text{CDCl}_3$ ) and  $^{13}\text{C}$  NMR (125.6 MHz) of compound 1

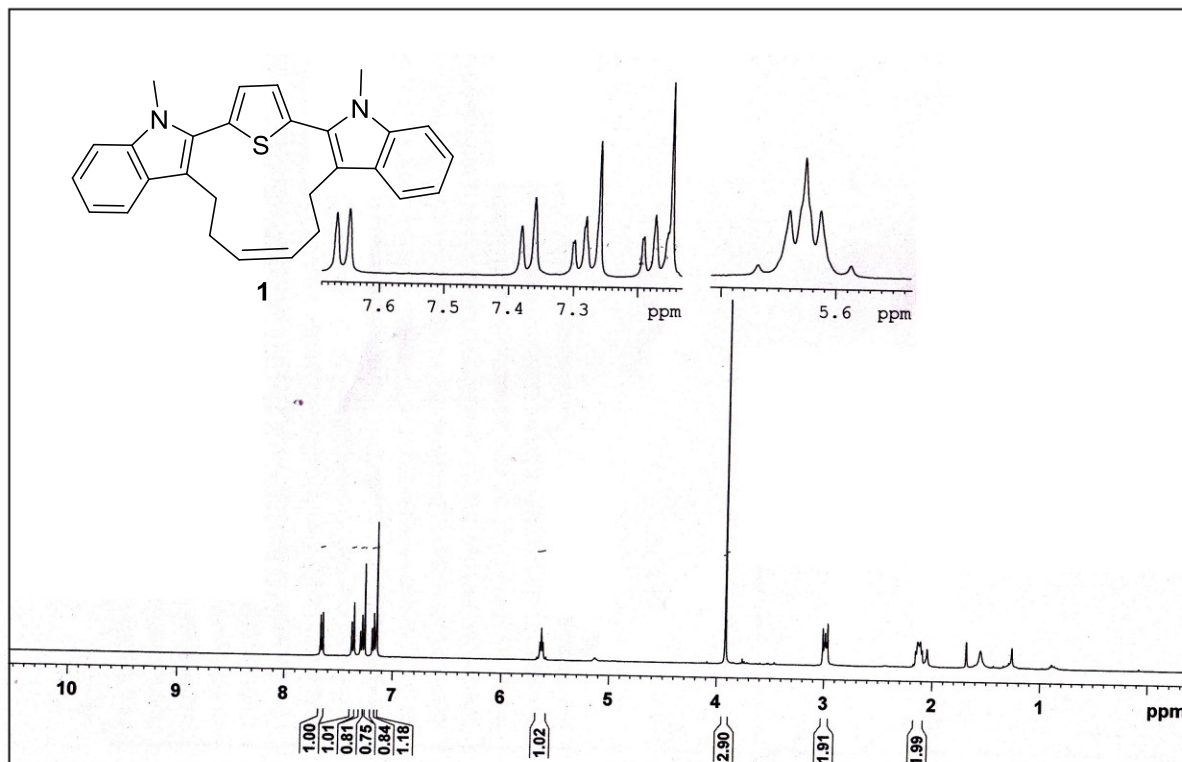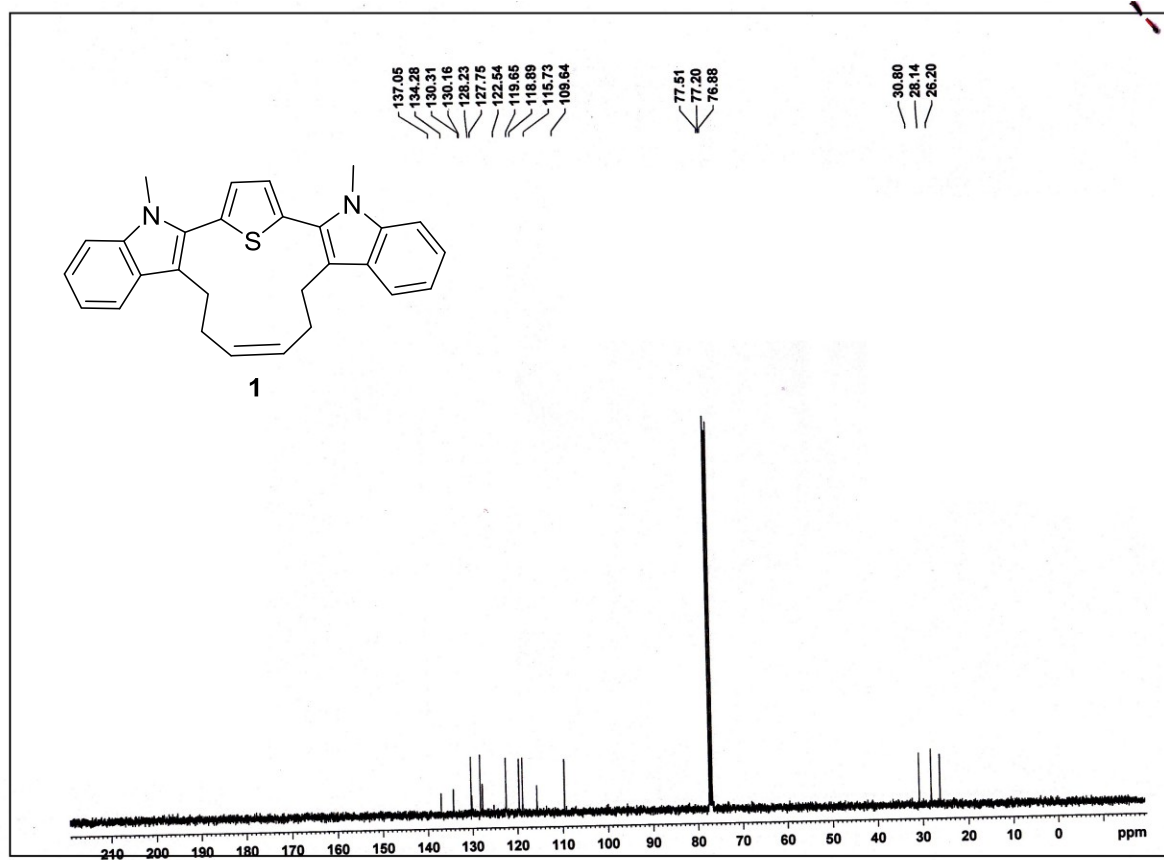



**<sup>1</sup>H NMR (500 MHz, CDCl<sub>3</sub>) and <sup>13</sup>C NMR (125.6 MHz) of compound 5a**

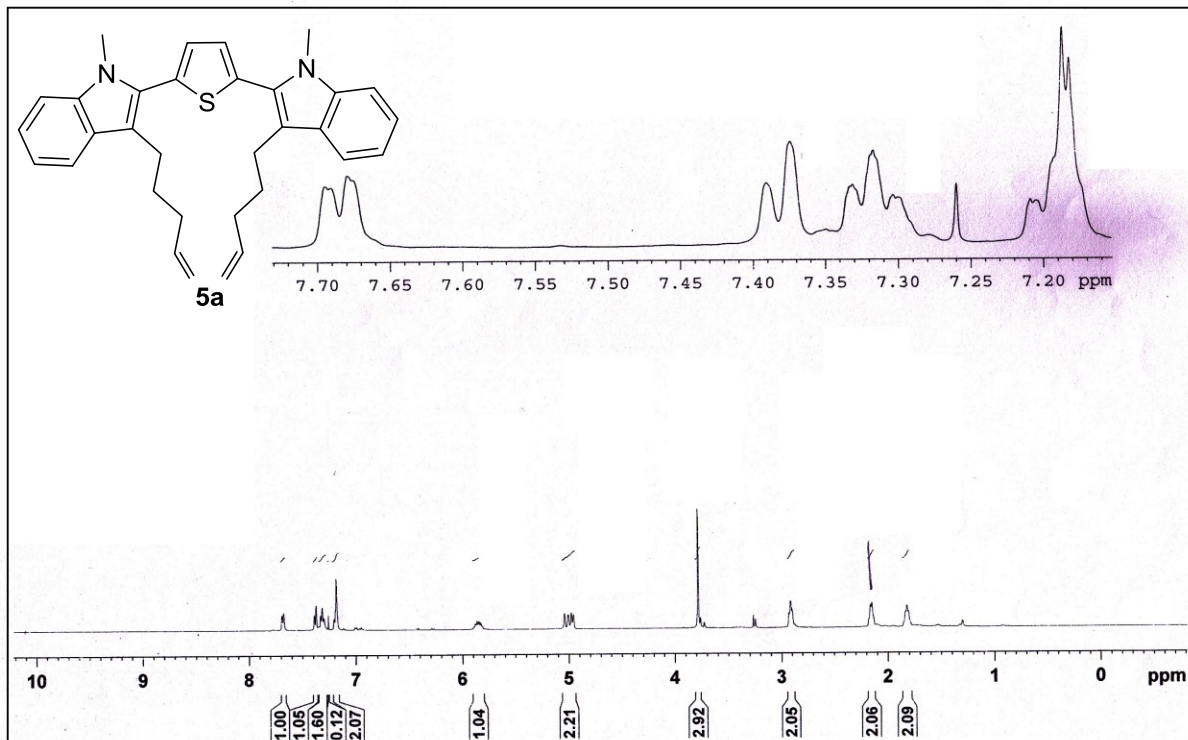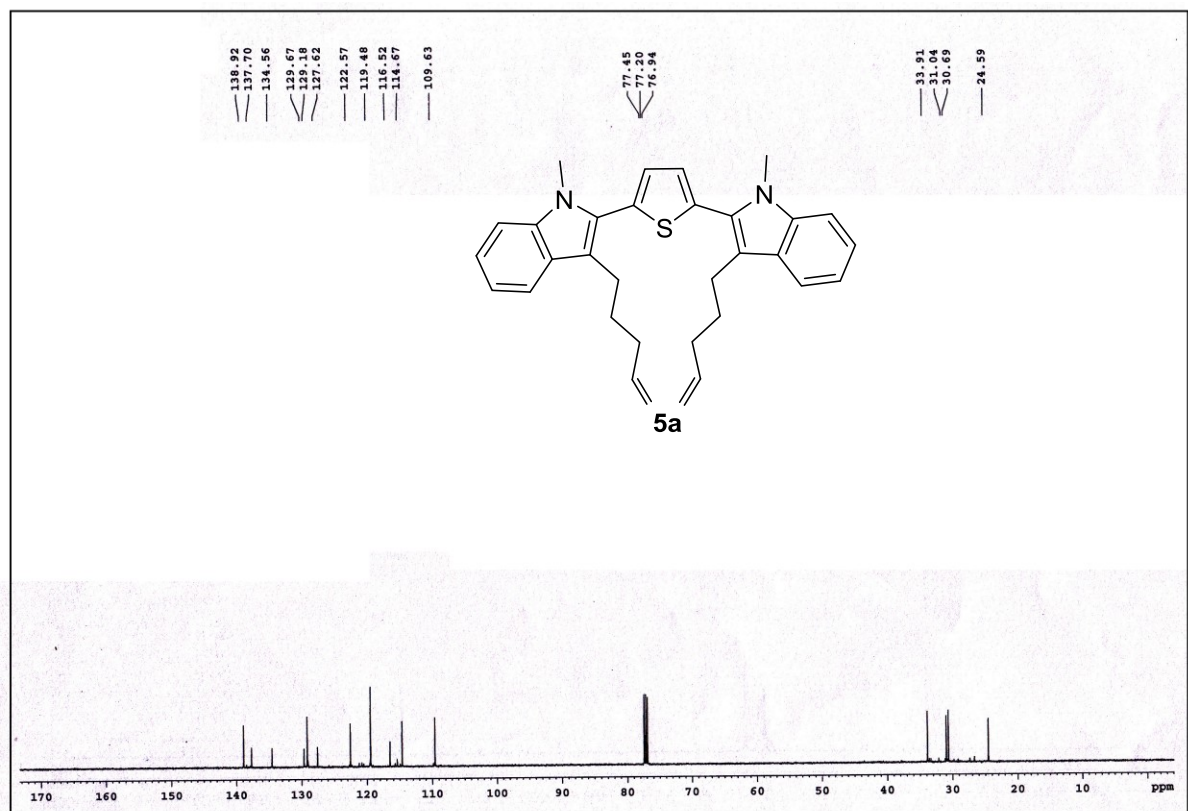



**$^1\text{H}$  NMR (500 MHz,  $\text{CDCl}_3$ ) and  $^{13}\text{C}$  NMR (125.6 MHz) of compound 1a**

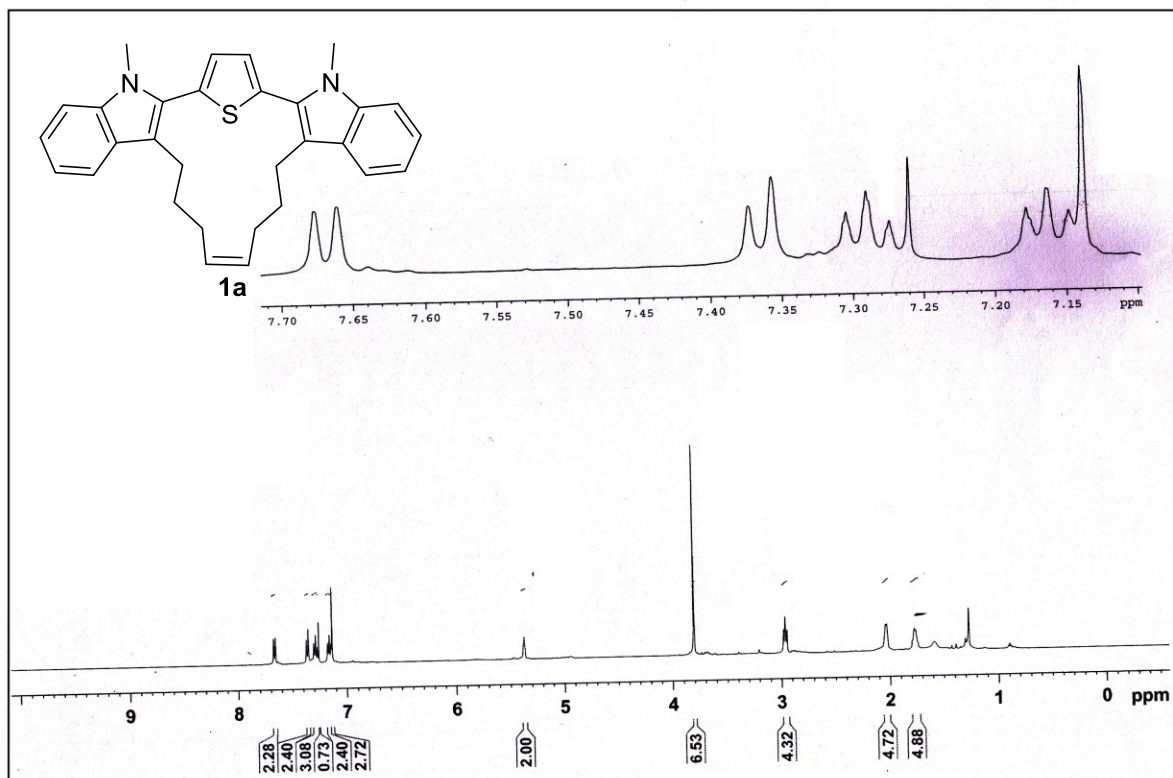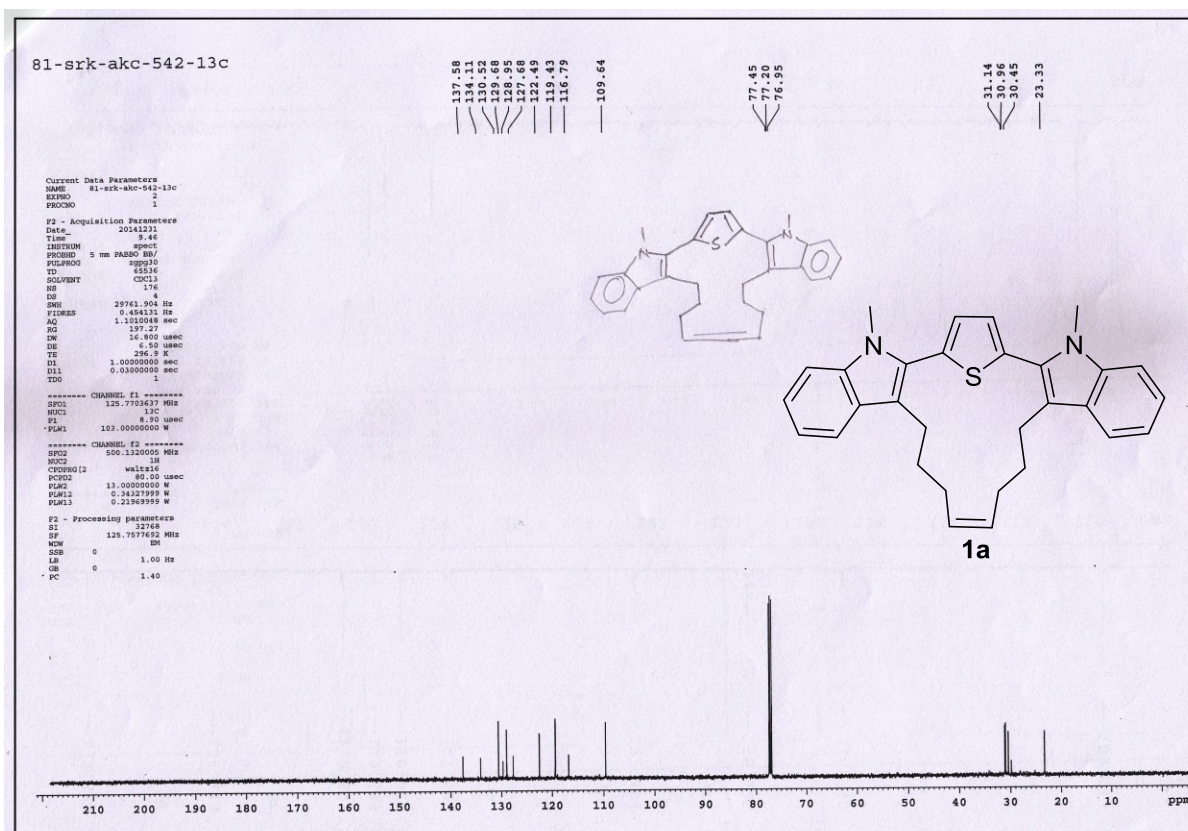

Supplement: Additional file 1 [file 1860-5397-11-165-S1.pdf]
